# Supplementary material
Source: PubMed Central journal article supplement (PMC4192058)
Supplement: NIHMS578268-supplement-01.pdf [file NIHMS578268-supplement-01.pdf]

## Supplementary material

Manuscript JN2013510

### Supplementary material. Detailed mathematical explanations of binomial distribution:

$$\Pr(M \text{ mutant gp16 in the motor}) = \binom{Z}{M} p^{Z-M} q^M = \left( \frac{Z!}{M!(Z-M)!} \right) p^{Z-M} q^M$$

(Equation A)

If  $K = 1$ , then the motor activity will be  $\binom{6}{0} p^6$ ; if  $K = 2$ , then the motor activity will be  $\binom{6}{0} p^6 + \binom{6}{1} p^5 q^1$ ; if  $K = 3$ , then the motor activity will be  $\binom{6}{0} p^6 + \binom{6}{1} p^5 q^1 + \binom{6}{2} p^4 q^2$ ; if  $K = 4$ , then the motor activity will be  $\binom{6}{0} p^6 + \binom{6}{1} p^5 q^1 + \binom{6}{2} p^4 q^2 + \binom{6}{3} p^3 q^3$ ; if  $K = 5$ , then the motor activity will be  $\binom{6}{0} p^6 + \binom{6}{1} p^5 q^1 + \binom{6}{2} p^4 q^2 + \binom{6}{3} p^3 q^3 + \binom{6}{4} p^2 q^4$ ; and if  $K = 6$ , then the motor activity will be  $\binom{6}{0} p^6 + \binom{6}{1} p^5 q^1 + \binom{6}{2} p^4 q^2 + \binom{6}{3} p^3 q^3 + \binom{6}{4} p^2 q^4 + \binom{6}{5} p^1 q^5$ .
